# Supplementary material for: Geometry-dependent compressive responses in nanoimprinted submicron-structured shape memory polyurethane
Source: Royal Society of Chemistry journal article supplement (doi:10.1039/c7sm00574a), 2017-01-01
Supplement: c7sm00574a1.pdf [file c7sm00574a1.pdf]

## Supplementary Information

### **Geometry-dependent compressive responses in nanoimprinted submicron-structured shape memory polyurethane**

Wei Li Lee<sup>a,b</sup>, Hong Yee Low<sup>b,\*</sup> and Christine Ortiz<sup>a,\*</sup>

<sup>a</sup>Department of Materials Science and Engineering, Massachusetts Institute of Technology, 77  
Massachusetts Avenue, Cambridge, MA 02139, United States

<sup>b</sup>Engineering Product Development, Singapore University of Technology and Design, 8  
Somapah Road, Singapore 487372, Singapore

\*hongyee\_low@sutd.edu.sg

\*cortiz@mit.edu

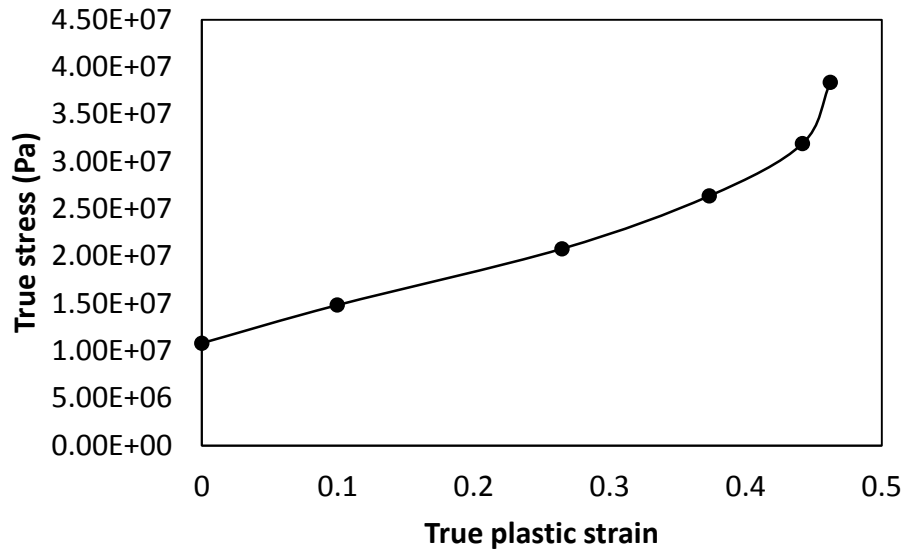

(a)

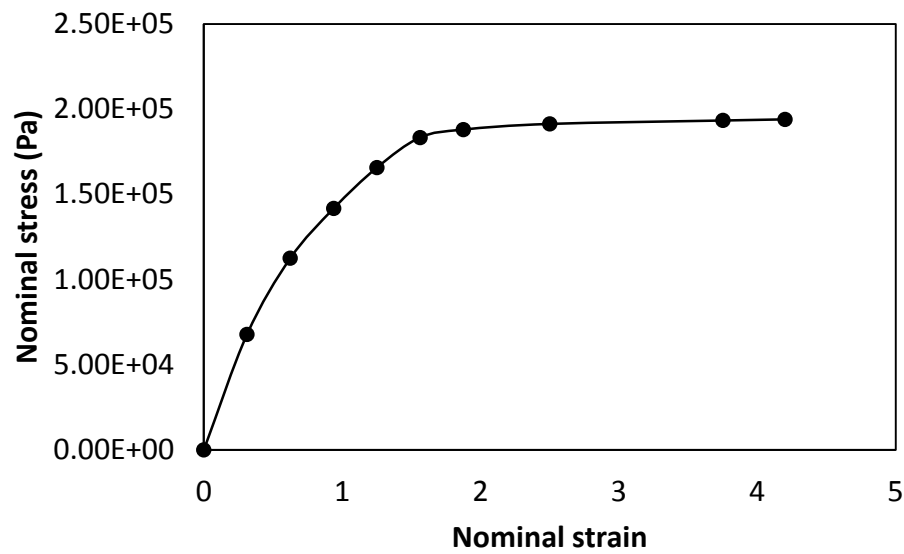

(b)

**Figure S1.** (a) Yield stress-yield strain curve at room temperature. (b) Uniaxial nominal stress-strain curve at 90 °C.

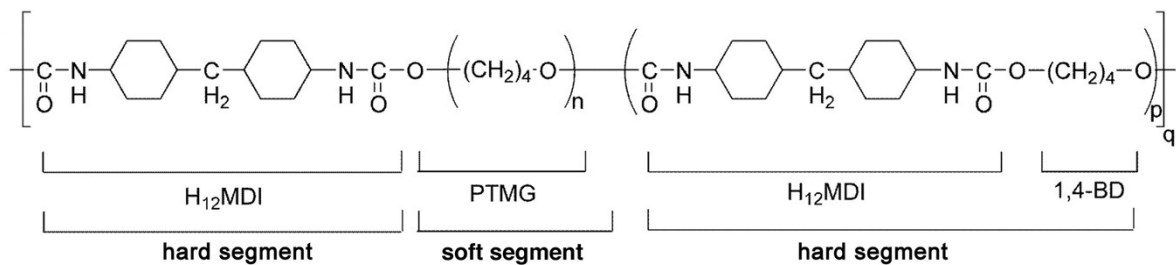

**Figure S2. Chemical structure of the shape memory thermoplastic elastomer Tecoflex EG72D.** It is synthesized from methylene bis(*p*-cyclohexyl isocyanate) (H<sub>12</sub>MDI), 1,4-butanediol (BD), and poly(tetramethylene glycol) (PTMG).

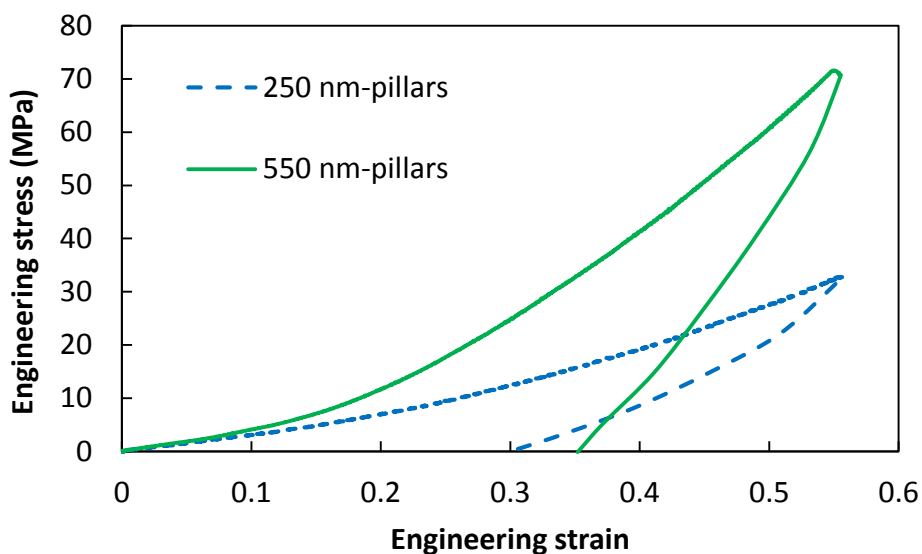

(a)

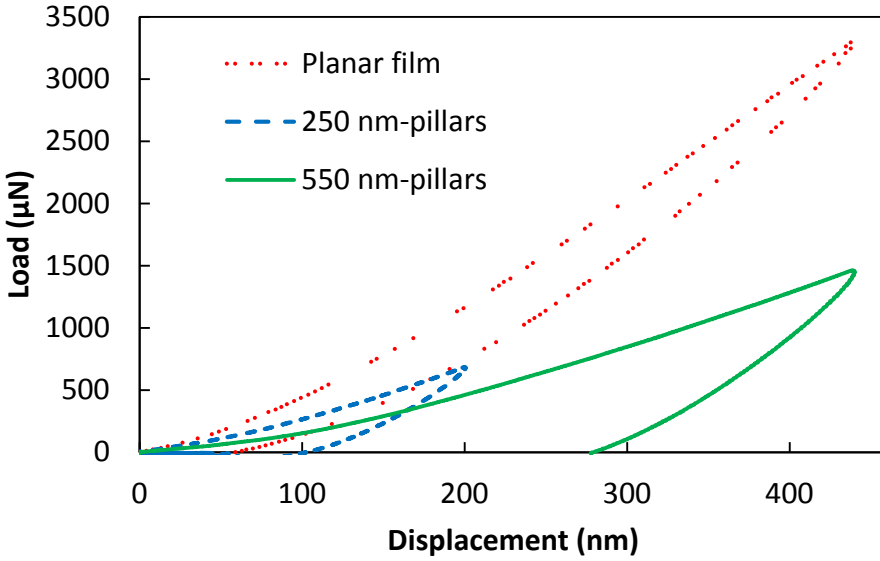

(b)

**Figure S3.** (a) Stress-strain curves in a loading-unloading cycle in compression of 250 nm-pillars and 550 nm-pillars by a flat punch diamond indenter. (b) Load-displacement curves of displacement-controlled indentation. The strain rate and maximum compressive strain attained before unloading are  $0.1 \text{ s}^{-1}$  and 55%, respectively,

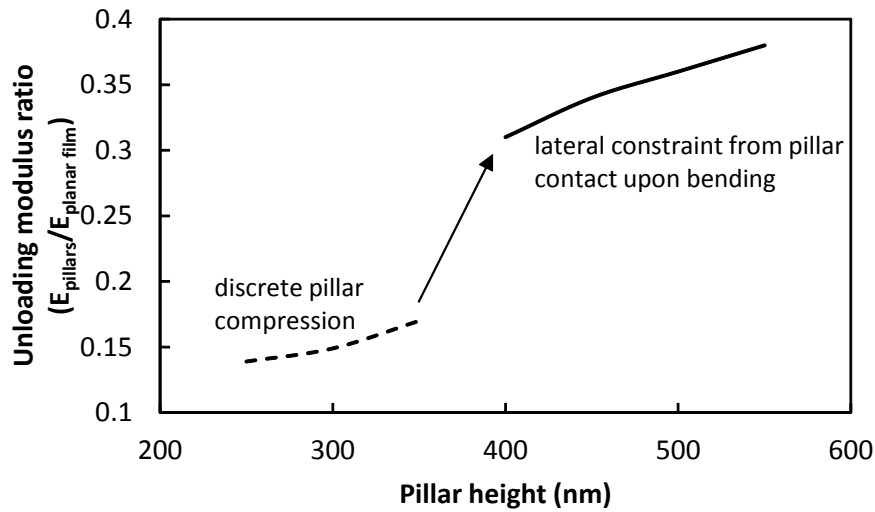

**Figure. S4.** FEA predictions of unloading modulus ratio as a function of pillar height.

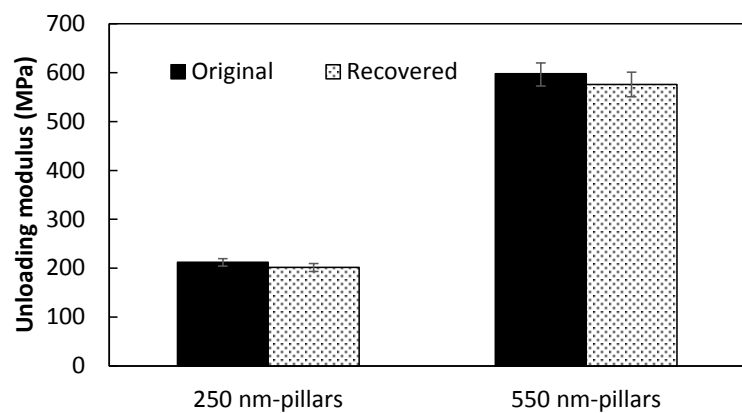

**Figure S5.** Unloading modulus values of the original and recovered patterns after five cycles of load-unloading.

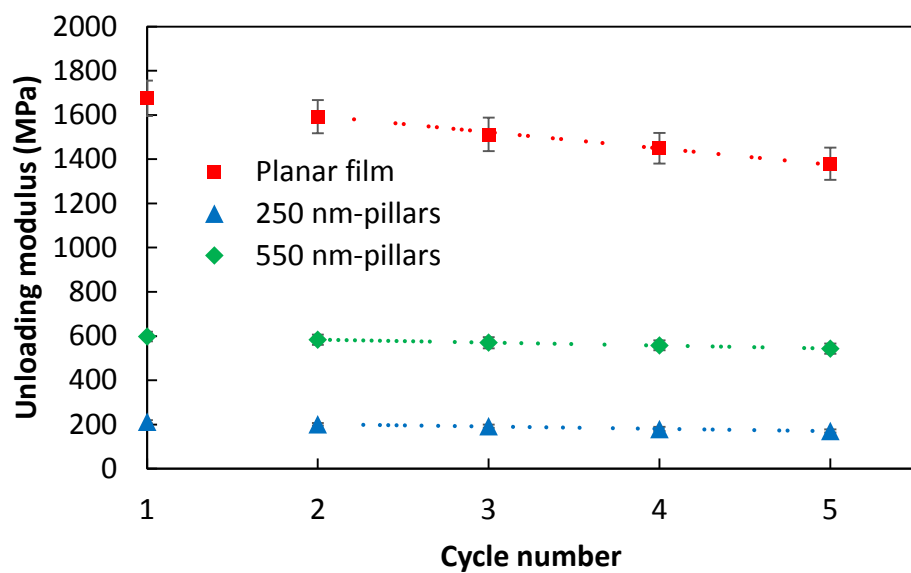

**Figure S6.** Changes in the unloading modulus as a function of loading-unloading cycles.

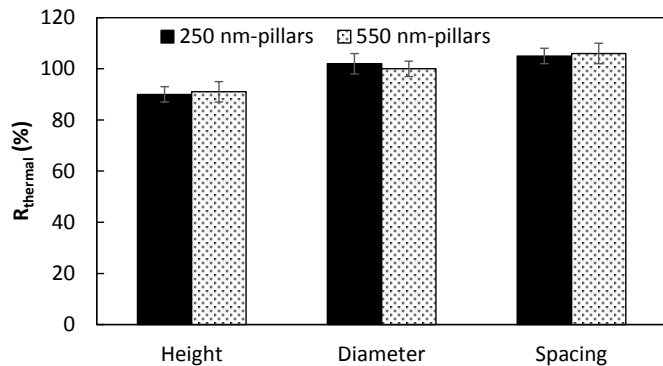

**Figure S7.** The calculated recovery percentage ( $R_{\text{thermal}} = \text{Recovered dimension} / \text{Original dimension} \times 100\%$ ) after one cycle of shape programming at 200% strain and thermal recovery for the 250 nm- and 550 nm-pillars.

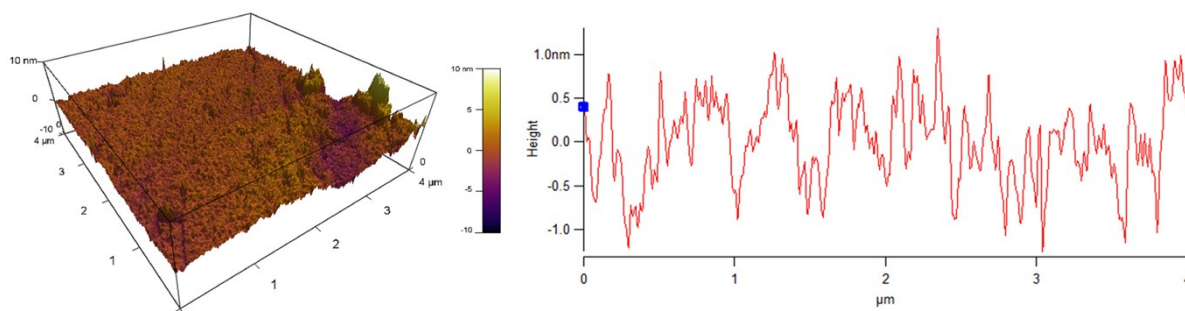

(a)

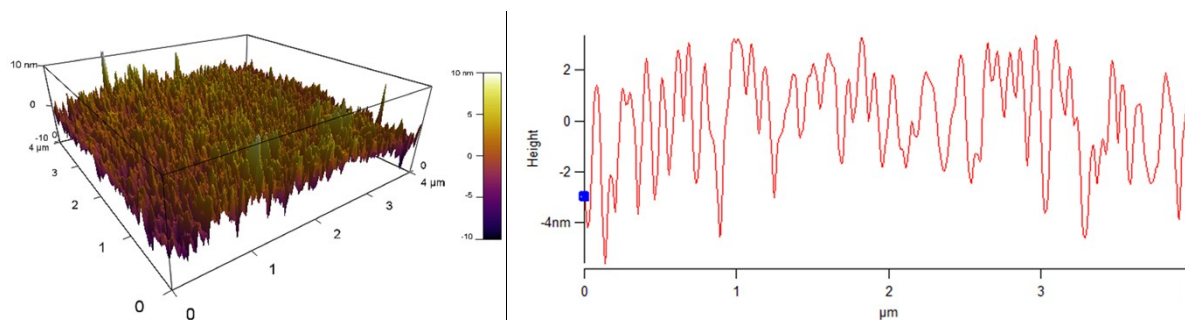

(b)

**Figure S8.** Topographic AFM images and the corresponding height profiles of (a) original (unstretched) planar film and (b) 200% stretched planar film.

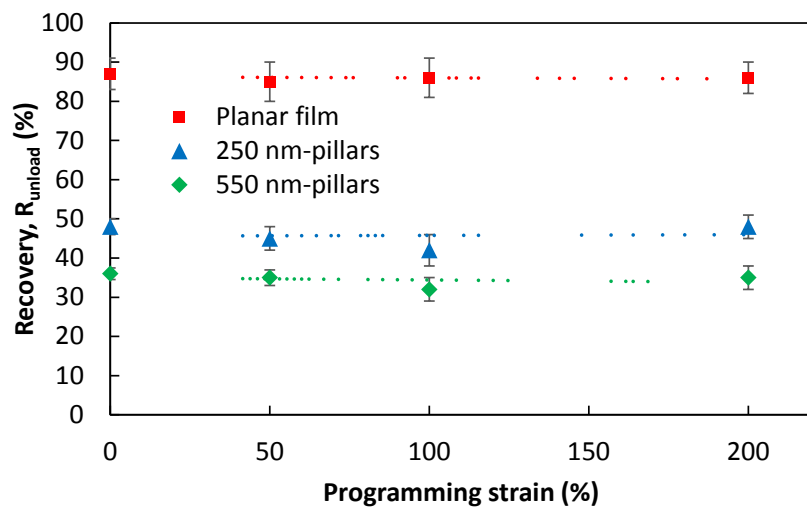

(a)

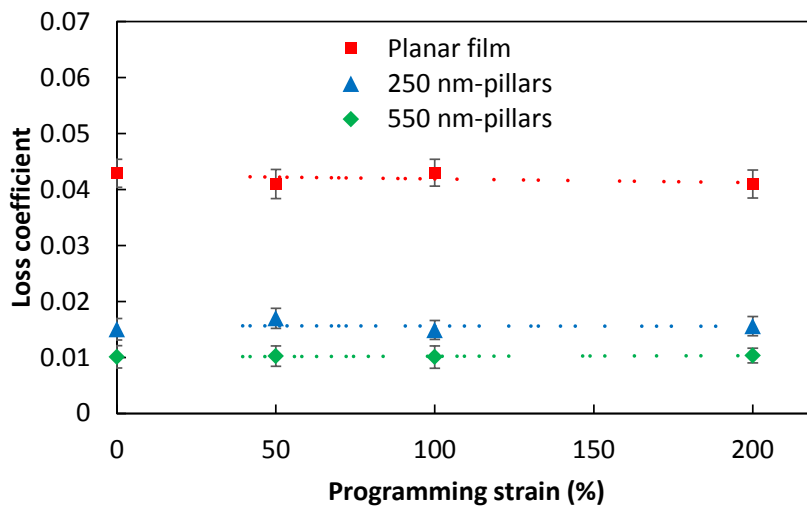

(b)

**Figure S9.** Changes in the (a) elastic recovery (b) loss coefficient as a function of programming tensile strain for the planar film, 250 nm-pillars and 550 nm-pillars.

**Table S1.** Dimensional analyses (mean  $\pm$  standard deviation for  $n > 60$  measurements) of 250 nm- and 550 nm-pillars under different tensile strains.

| Pillar system  | Macroscopic applied tensile strain (%) | Width of the top surface along stretching (nm) | Width of the top surface orthogonal to stretching (nm) | Width of the bottom surface along stretching (nm) | Width of the bottom surface orthogonal to stretching (nm) | Height (nm)  | Pillar areal density ( $\mu\text{m}^{-2}$ ) |
|----------------|----------------------------------------|------------------------------------------------|--------------------------------------------------------|---------------------------------------------------|-----------------------------------------------------------|--------------|---------------------------------------------|
| 250 nm-pillars | 0 (as-imprinted)                       | $227 \pm 5$                                    | $228 \pm 6$                                            | $235 \pm 4$                                       | $229 \pm 5$                                               | $248 \pm 5$  | 8.68                                        |
|                | 50                                     | $232 \pm 4$                                    | $225 \pm 5$                                            | $351 \pm 6$                                       | $222 \pm 6$                                               | $238 \pm 4$  | 7.03                                        |
|                | 100                                    | $240 \pm 5$                                    | $220 \pm 5$                                            | $395 \pm 7$                                       | $216 \pm 6$                                               | $225 \pm 5$  | 5.54                                        |
|                | 200                                    | $258 \pm 7$                                    | $213 \pm 6$                                            | $550 \pm 9$                                       | $209 \pm 8$                                               | $196 \pm 15$ | 4.50                                        |
| 550 nm-pillars | 0 (as-imprinted)                       | $232 \pm 7$                                    | $234 \pm 10$                                           | $238 \pm 8$                                       | $231 \pm 7$                                               | $553 \pm 10$ | 8.26                                        |
|                | 50                                     | $238 \pm 8$                                    | $235 \pm 7$                                            | $379 \pm 10$                                      | $225 \pm 7$                                               | $517 \pm 15$ | 7.07                                        |
|                | 100                                    | $240 \pm 5$                                    | $229 \pm 5$                                            | $403 \pm 9$                                       | $219 \pm 6$                                               | $495 \pm 14$ | 5.83                                        |
|                | 200                                    | $253 \pm 9$                                    | $224 \pm 6$                                            | $562 \pm 10$                                      | $212 \pm 7$                                               | $430 \pm 18$ | 4.82                                        |
